# Supplementary material for: Disparities in access to diagnosis and care in Blantyre, Malawi, identified through enhanced tuberculosis surveillance and spatial analysis
Source: PubMed Central journal article supplement (PMC6350280; doi:10.1186/s12916-019-1260-6), 2019-01-29

**A**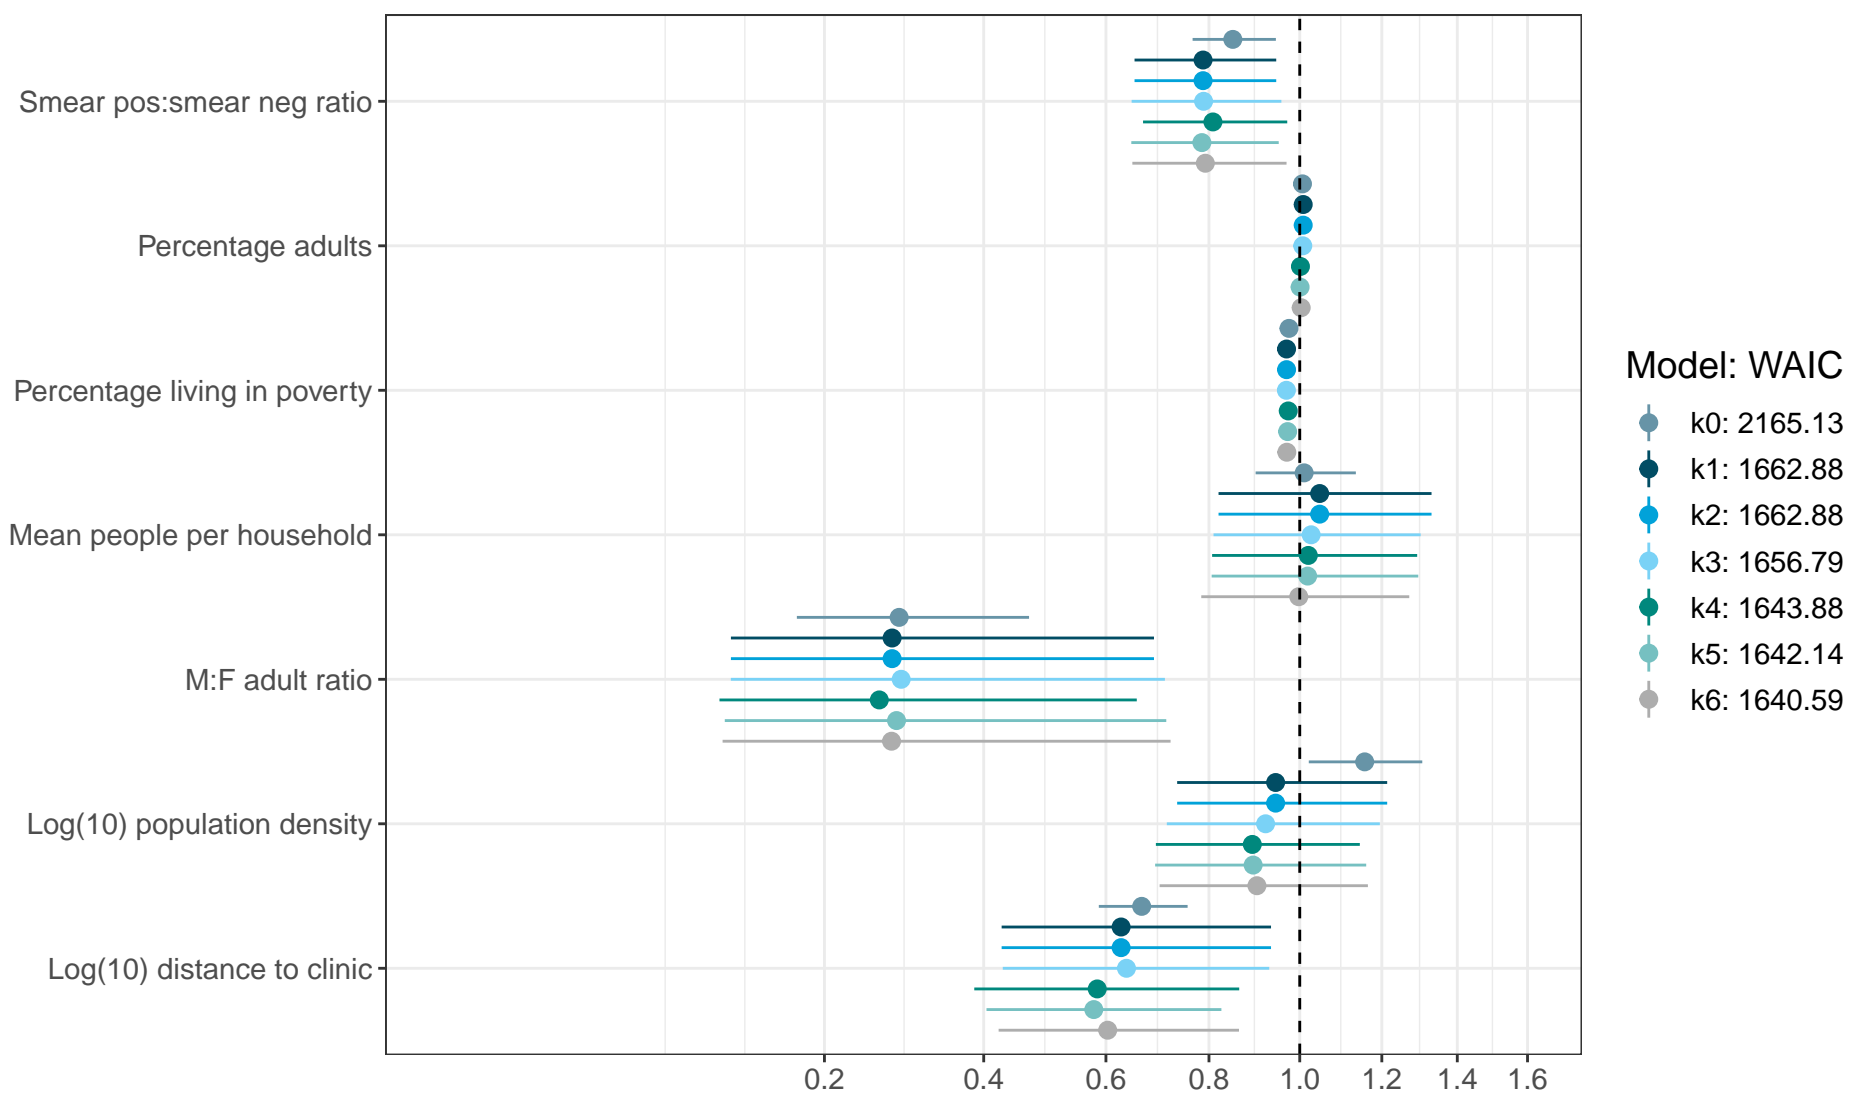**B**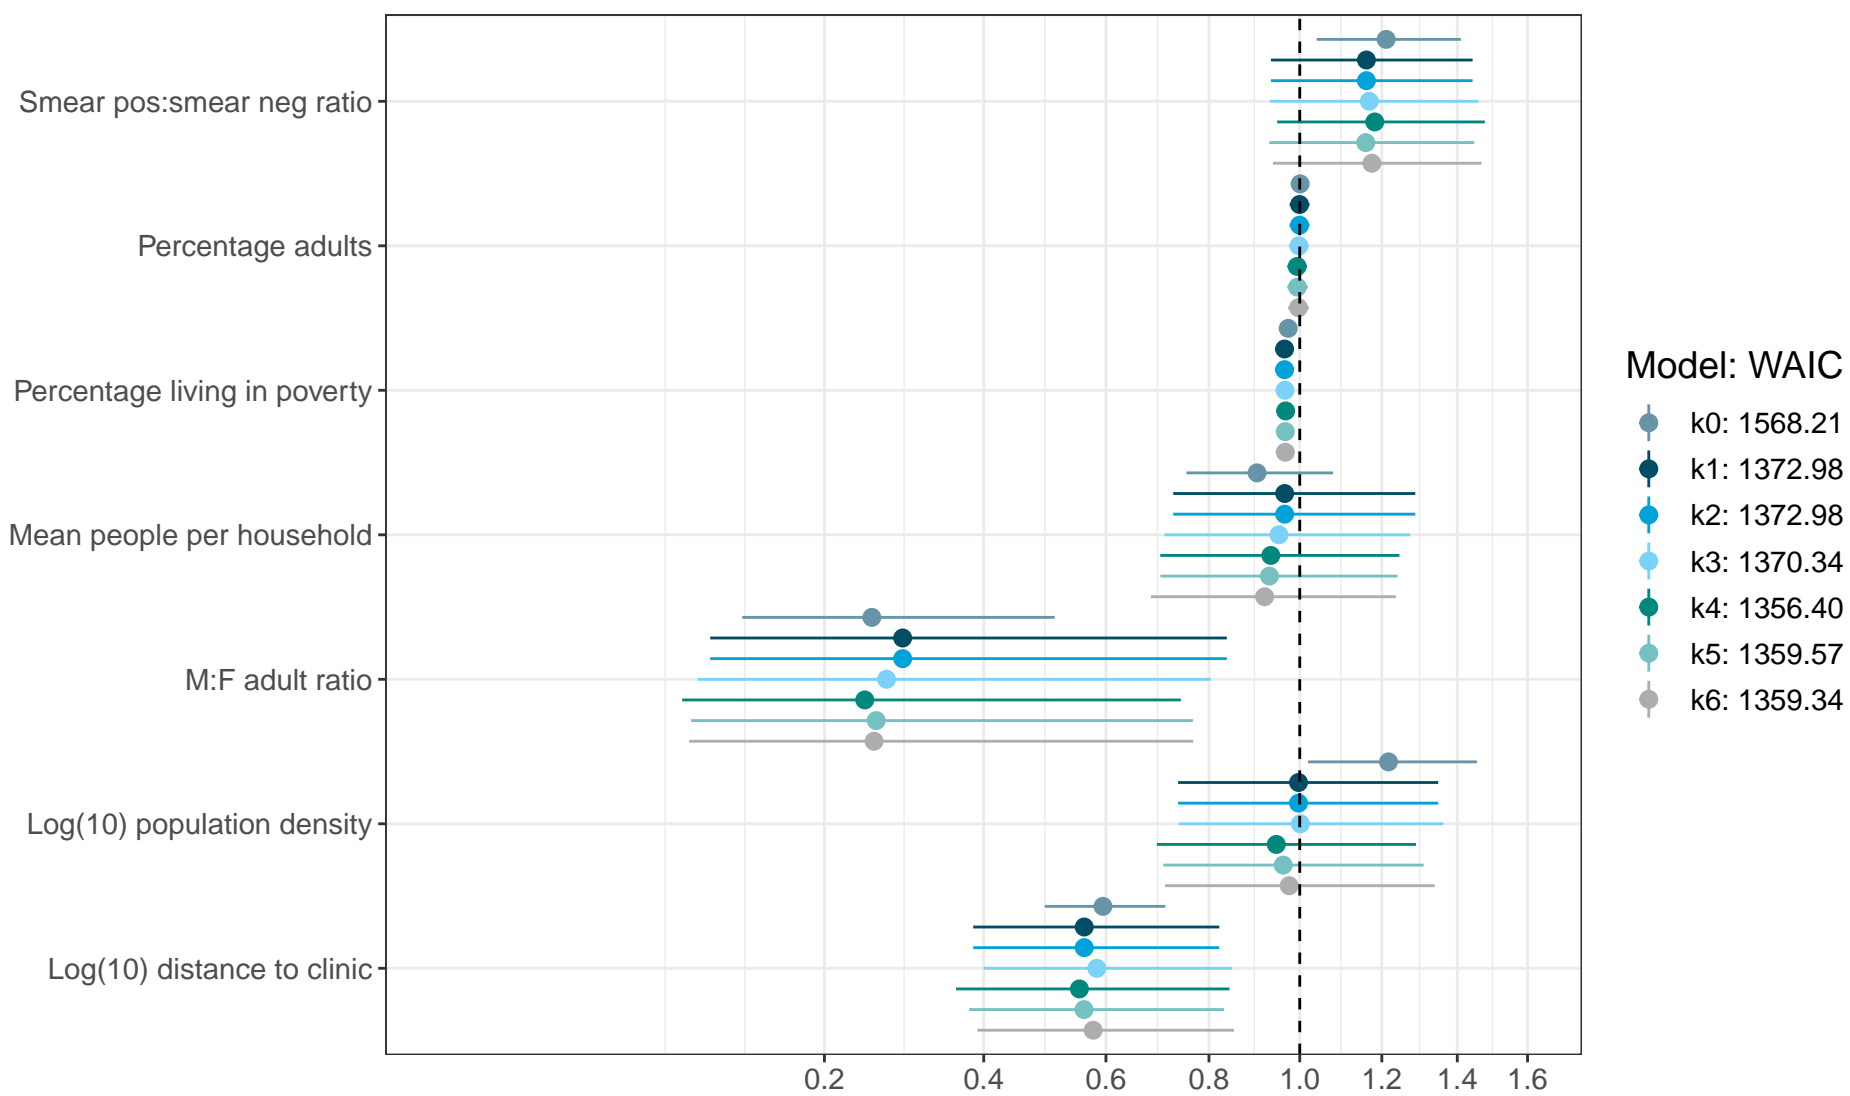

Supplement: 12916_2019_1260_MOESM3_ESM.pdf [file 12916_2019_1260_MOESM3_ESM.pdf]
